## **A method for rapid selection of randomly induced mutations in a gene of interest using CRISPR/Cas9 mediated activation of gene expression.**

William A. Ng<sup>\*</sup>, Andrew Ma<sup>\*</sup>, Molly Chen<sup>\*</sup>, Bruce H. Reed<sup>\*<sup>‡</sup></sup>

<sup>\*</sup>Department of Biology, University of Waterloo, Waterloo, ON, Canada N2L 3G1.

<sup>‡</sup>Author responsible for correspondence with journal:

Bruce H. Reed, Department of Biology, University of Waterloo, 200 University Avenue West, Waterloo, Ontario, Canada N2L 3G1. Phone: 519-888-4567 x38085, Fax: 519-746-0614

Email: [reed@uwaterloo.ca](mailto:reed@uwaterloo.ca)

Running title: Rapid selection of randomly induced mutations using CRISPR/Cas9

Key words: CRISPR/Cas9, gene overexpression, mutant screen, *hindsight/RREB-1*

## Abstract

We have developed a CRISPR/Cas9 based method for isolating randomly induced recessive lethal mutations in a gene of interest (GOI) by phenotype selection within the F1 progeny of a single genetic cross. Our method takes advantage of the ability to overexpress a GOI using CRISPR/Cas9 mediated activation of gene expression. In essence, the screening strategy is based upon the idea that if overexpression of a wild type allele can generate a phenotype, then overexpression of a newly induced loss-of-function allele will lack this phenotype. This method also depends on the use of CRISPR/Cas9 based mutagenesis to recover alleles of a GOI that are refractory to CRISPR/Cas9 mediated activation of gene expression but are otherwise wild type. As a proof-of-principle, we used this method to select EMS induced mutations of the *Drosophila* gene *hindsight (hnt)*. From approximately 45,000 F1 progeny we recovered 8 new EMS induced loss-of-function *hnt* alleles that we characterized as an allelic series of hypomorphic mutations. This new method can, in theory, be used to recover randomly induced point mutants in a GOI and can be applied to any circumstance where CRISPR/Cas9 mediated activation of gene expression is associated with lethality or a visible phenotype.

## Introduction

CRISPR/Cas9 based genome editing represents a significant advance within the field of genetics. In general, co-expression of Cas9 and an engineered single guide RNA (sgRNA) forms a sequence homology-dependent endonuclease that creates DNA double-stranded breaks (DSBs) within a specified target sequence (1), and this has also been successfully used in *Drosophila* (2, 3). DSBs can be repaired by the cell's endogenous DNA repair machinery, either through error-prone non-homologous end-joining (NHEJ), possibly resulting in mutations – small insertions or deletion, or through homology directed repair (HDR), which requires template DNA containing sequences homologous to the regions flanking the DSB. The CRISPR/Cas9 system is now routinely used to facilitate gene knockout and gene replacement strategies in various model genetic organisms (4).

The CRISPR/Cas9 system is remarkable in that it allows the localization of a protein/RNA complex (Cas9 + sgRNA) to a specific sequence within the genome, as specified through a 17-20 nucleotide region of the sgRNA molecule. Being able to localize a protein to a specific DNA sequence opens up many new opportunities, and Cas9 has been modified to create several new tools and techniques. By mutating the catalytic sites of the Cas9 endonuclease, a catalytically inactive or “dead” Cas9 (dCas9) has been developed (5). Various dCas9 fusion proteins have subsequently been designed, and the dCas9 system can be used for a variety of new applications, including the activation or repression of gene transcription, site-specific chromatin modification, or visualization of specific chromosome sites in living cells - see (6, 7) for reviews.

For *Drosophila* researchers, prior to the development of CRISPR/Cas9, targeted gene knockouts or gene replacement by homologous recombination were both possible, but challenging and labor intensive endeavors (8, 9). CRISPR/Cas9 strategies for gene knockout and gene replacement are now common techniques for many *Drosophila* research groups. Building on the *GAL4/UAS* system of inducible gene expression, CRISPR/Cas9 approaches for tissue specific target gene knockdown or overexpression in *Drosophila* are now also possible; resources, including >1600 transgenic stocks expressing different sgRNAs made by the *Drosophila* RNAi Screening Center and Transgenic RNAi Project (DRSC/TRiP) are publically available – see (10) for overview of resources. In the case of targeted gene overexpression, the TRiP transgenic lines were designed to ubiquitously express two sgRNAs targeted to sequences upstream of a gene’s transcriptional start site (TSS) (11, 12). These lines are known as *TRiP-OE*, or *TOE* lines. Target gene overexpression is achieved by crossing a *TOE* line to a line that carries a *GAL4* driver of one’s choice and *UAS-dCas9.VPR*, which is dead-Cas9 fused to the VPR transcriptional activation domain. Other sgRNA lines known as *TRiP-KO*, or *TKO* lines, designed for gene knockout, ubiquitously express a single sgRNA targeted to the coding region of a GOI, and can be used to create germline or somatic mutations by crossing to a line that carries the appropriate *GAL4* driver along with *UAS-Cas9* (active Cas9), or a germline specific *Cas9* construct (*nos-Cas9* or *vasa-Cas9*).

We are interested in the regulation and function of the gene *hindsight* (*hnt*), which is the *Drosophila* homolog of mammalian *Ras Responsive Element Binding Protein-1* (*RREB-1*) (13, 14). Most mutations of *hnt* are recessive and embryonic lethal, and fail in the morphogenetic process of germ band retraction (15). In this study we confirm *hnt*



overexpression using a *TRiP-OE sgRNA* with *GAL4* and *UAS-dCas9.VPR*. We also demonstrate that CRISPR/Cas9 mediated activation of gene expression is dose dependent and can be used as a new approach for the characterization of mutant alleles.

Furthermore, we show that crossing a *TOE-sgRNA* line to a line having germline expression of active Cas9 can allow for the recovery of lines that are refractory to dCas9.VPR mediated activation of gene expression. Such refractory lines have mutated sgRNA target sequences, but are in all other respects wild type for *hnt* expression and function. We show that refractory alleles can be maintained as homozygous stocks with *TOE-sgRNA + GAL4 + UAS-dCas9.VPR* and show no overexpression phenotype.

Crossing these refractory lines to stocks that are responsive to dCas9.VPR-mediated activation of gene expression results in the reappearance of the overexpression phenotype in F1 progeny. If, however, the progeny of the same cross also carry a loss-of-function *hnt* allele, then the overexpression phenotype is abrogated. Building upon these observations, and as a proof of principle, we present the development of a new screening strategy that allows for the selection of randomly induced recessive lethal alleles in an F1 visible screen. Following EMS treatment of a responsive line, and crossing to the refractory line that carries *TOE-sgRNA + GAL4 + UAS-dCas9.VPR*, we screened for the absence of an overexpression phenotype and, in so doing, selected 8 new alleles of *hnt* from ~45,000 F1 progeny over a period of 2-3 weeks. We suggest that this method for the selection of randomly induced mutations in a GOI can be used in any context where Cas9-mediated activation of gene expression is associated with a phenotype (either visible or lethal). Such recovery of numerous mutant alleles in a GOI is potentially useful for analysis of mutation profiles, or the rapid recovery of an allelic series for a

GOI. It could also be useful for efficient selection of CRISPR/Cas9 induced knockouts or gene replacements, given that the sgRNA used to induce mutations in the GOI does not disrupt the overexpression target sequences.

## Results

Previous work demonstrates CRISPR/Cas9 mediated *in vivo* activation of *hnt* expression. In this “proof-of-principle” example, ectopic *hnt* expression is shown in the third larval instar wing imaginal disc (11). To further investigate CRISPR/Cas9 mediated overexpression of *hnt*, we used the *TRiP-TOE* insertion line *TOE-GS00052*, which ubiquitously expresses two sgRNAs, targeted to 110-129 bps and 183-203 bps upstream of the TSS of *hnt* (Fig. 1A). Crossing line *TOE-GS00052* to a line that carries the eye specific *GMR-GAL4* driver and *UAS-dCas9.VPR* resulted in pupal lethality at 25°C, but viable and fertile adults with a strong rough eye phenotype at 18°C. The *hnt* overexpression phenotype, which we have also observed in the context of *GMR-GAL4 > UAS-GFP-Hnt*, is distinctive in that the eye margin is consistently more pigmented than the inner region, giving the appearance of dark rings around the eyes (Fig. 1 B,C). We confirmed that the rough eye phenotype in the context of *GAL4>UAS-dCas9.VPR + TOE-GSGS00052* is attributable to the overexpression of *hnt* by co-expression of *UAS-hnt-RNAi*, which resulted in a full suppression of the rough eye phenotype (Fig. 1E,F).

**The overexpression of *hnt* in the pupal eye is sensitive to gene dosage and temperature.**

Through a series of crosses carried out at 18°C, we recovered a stock carrying all three transgenes required for CRISPR/Cas9 mediated activation of *hnt* expression in the pupal eye (i.e. *GMR-GAL4*, *TOE-GS00052*, and *UAS-dCas9.VPR*). When transferred to 25°C, this stock was 100% pupal lethal, with no adult escapers. To test the dosage responsiveness of *hnt* overexpression, we crossed males of the overexpression stock (reared at 18°C) to females carrying a balanced deletion of *hnt* (*hnt* is an X-linked gene, so the stock was *Df(1)ED6727/FM7*). Interestingly, at 25°C all progeny of this cross are *FM7*<sup>+</sup> females and display the distinctive *hnt* overexpression rough eye phenotype, identical to *hnt*<sup>+</sup>/*hnt*<sup>+</sup> overexpression phenotype at 18°C. We subsequently found that other *hnt* alleles previously characterized as strong loss-of-function alleles (*hnt*<sup>*XE81*</sup>, *hnt*<sup>*1142*</sup>, *hnt*<sup>*345x*</sup>) also behave the same way, and only produce *FM7*<sup>+</sup> female progeny at 25°C (Fig. 1D). Other *hnt* alleles tested, including the hypomorphic semi-lethal allele *hnt*<sup>*308*</sup>, the temperature sensitive hypomorphic allele *hnt*<sup>*peb*</sup>, and the lethal allele *hnt*<sup>*PL67*</sup>, do not produce progeny at 25°C.

### **The recovery of *hnt* alleles refractory to CRISPR/Cas9 mediated overexpression.**

The above results suggest that suppression of dCas9.VPR mediated activation of gene expression could be used not only to characterize existing alleles, but to select newly induced loss-of-function mutations in a GOI. To be broadly applicable, however, it is necessary to recover GOI alleles that are refractory to CRISPR/Cas9 mediated activation of gene expression, but are in all other respects wild type. In general, such “*GOI*<sup>*REF*</sup>” alleles permit the recovery of heterozygotes in situations where an overexpression phenotype is not sensitive to dosage or temperature. For example, in a

CRISPR/Cas9 overexpression background, a  $GOI^{REF}/GOI^+$  heterozygote might be associated with a visible phenotype or be lethal, whereas a  $GOI^{REF}/GOI^{null}$  heterozygote would be incapable of GOI overexpression and would, therefore, have normal viability and no overexpression phenotype.

In order to recover  $hnt^{REF}$  alleles ( $hnt$  alleles refractory to CRISPR/Cas9 mediated activation of gene expression – but otherwise wild type), we used the approach of transmitting the ubiquitously expressed TOE-sgRNA transgene *GS00052* through the female germline with active Cas9 expression (crossing scheme is outlined in Fig. 2). In our case, we were able to cross such females to males carrying all three transgenes required for CRISPR/Cas9 mediated activation of gene expression of  $hnt$  in the pupal eye (*i.e.* the  $y\ w$ ; *GMR-GAL4 TOE-GS00052*; *UAS-dCas9.VPR* stock that is viable at 18°C). Progeny of this cross that carried all three transgenes, but not displaying the overexpression phenotype were found in abundance. In order to recover isogenic refractory lines, single refractory males were crossed with *FM7* females, and through selection and backcrossing, isogenic refractory lines devoid of the autosomal transgenes were established (Fig. 2, scheme line 1). Two such lines were sequenced and both proved to carry deletions in both sgRNA target sites. Other lines were established by backcrossing single refractory males to  $y\ w$ ; *GMR-GAL4 TOE-GS00052* / *CyO*; *UAS-dCas9.VPR* / *TM6* females (raised at 18°C). Subsequent crosses performed at 25°C allowed the selection of heterozygous viable  $hnt^+/hnt^{REF}$  females, which were again backcrossed, allowing for selection a triple homozygous stock:  $hnt^{REF}$ ; *GMR-GAL4 TOE-GS00052*; *UAS-dCas9.VPR*, from here on referred to as the “RGV” stock (Fig. 2, scheme line 2).

We found the *RGV* stock to be viable with no overexpression phenotype raised at 25°C. We also checked the *RGV* stock by crossing females to *hnt*<sup>+</sup> males (responsive to dCas9.VPR mediated activation of gene expression) and confirmed the expected phenotypes of viable female *hnt*<sup>+</sup>/*hnt*<sup>REF</sup> progeny displaying the overexpression eye phenotype and viable male *hnt*<sup>REF</sup> progeny with no overexpression phenotype. Likewise, we confirmed that *hnt*<sup>+</sup>/*hnt*<sup>+</sup> females crossed to *RGV* males results in only female progeny that display the overexpression phenotype. In addition, we also re-tested *Df(1)ED6727* as well as the strong *hnt* alleles (*hnt*<sup>XE81</sup>, *hnt*<sup>1142</sup>, *hnt*<sup>345x</sup>) by crossing females of these *FM7* balanced lines to *RGV* males, which confirmed that *FM7*<sup>+</sup> female progeny (*hnt*/*hnt*<sup>REF</sup>) are viable and show no overexpression phenotype. Similar crosses to other *hnt* alleles (*hnt*<sup>peb</sup>, *hnt*<sup>308</sup>, and *hnt*<sup>PL67</sup>) confirmed that female heterozygous progeny (*hnt*/*hnt*<sup>REF</sup>) are, in these cases, viable but do show the *hnt* overexpression phenotype.

### **An F1 visible screen for recessive lethal mutations of *hnt* using the *RGV* stock.**

As a proof of principle, we used the *RGV* stock to screen for new mutant alleles of *hnt* induced by EMS mutagenesis. In the screen (outlined in Fig. 3), *RGV* virgin females were crossed to mutagenized males carrying the [*w*<sup>+</sup>] insertion *PBac{RB}e02388b*, which is tightly linked to *hnt* (inserted 6104 bp upstream) and has an unusual and easily scored crescent pattern of [*w*<sup>+</sup>] expression in the posterior eye. Recovery of newly induced *hnt* mutations was performed as an F1 visible screen for female progeny lacking the *hnt* overexpression phenotype. We screened approximately 45,000 progeny, from which we isolated 39 F1 females lacking the *hnt* eye overexpression phenotype. Of the 39 rare female progeny, 15 lines bred true and were established as balanced stocks over *FM7h,w*

without the autosomal [ $w^+$ ] transgenes *GMR-GAL4* and *UAS-dCas9.VPR* from the *RGV* stock.

### **Characterization of new *hnt* alleles.**

Balanced lines recovered in the screen were retested for their refractory nature by crossing to *RGV* males and also tested for complementation with *hnt<sup>XE81</sup>* (see Materials and Methods for description of complementation cross). Following retesting, we recovered eight new mutant alleles of *hnt* (all lethal alleles) and seven lines that carried new *hnt<sup>REF</sup>* (*hnt<sup>+</sup>*) alleles. Of note, *hnt<sup>REF-BHR7</sup>* was found to be mildly responsive to overexpression in males in the *RGV* retest, but completely refractory in females. All new *hnt<sup>REF</sup>* alleles were sequenced by direct PCR sequencing (Fig. 4). The line *hnt<sup>REF-BHR7</sup>* was found to have a single base pair change A >T within the first sgRNA target sequence, and *hnt<sup>REF-WN72</sup>* was found to have a single base pair change of C >T within the PAM motif of the second sgRNA target sequence. Interestingly, these two *hnt<sup>REF</sup>* alleles, where each is associated with a single base pair change affecting one sgRNA target sequence or the other, suggests that dCas9.VPR activation of *hnt* expression is only effective when both guide target sequences are fully intact and functional. All other *hnt<sup>REF</sup>* lines were found to contain an identical deletion spanning from the first guide target to the second. Since each of these five lines was isolated from the same bottle, this likely corresponds to a “premeiotic cluster”, resulting from a mutation induced in a germline stem cell. Overall, therefore, we conclude that our screen resulted in the recovery of eight new *hnt* mutant alleles and only three new *hnt<sup>REF</sup>* alleles.

All new *hnt* mutant alleles were also confirmed by failure to complement the temperature sensitive hypomorphic allele *hnt<sup>peb</sup>* at the restrictive temperature of 29°C. Using *Ubi-DEcadherin-GFP*, we imaged pupal eyes of all *hnt<sup>peb</sup>/hnt<sup>new</sup>* heteroallelic combinations at 25°C, which we found to be a more sensitive background for the *hnt<sup>peb</sup>* phenotype. The severity of each allele was ranked by quantification of cones cells, which invariably number four per ommatidium in wild type (Fig. 5A). Mutant ommatidia frequently contain fewer than four cone cells per ommatidium (Fig. 5B-D, white arrowheads). Occasionally mutant ommatidia were found to contain 5 or 6 cone cells; these likely result from ommatidial fusion as they also contain three rather than two primary pigment cells (Fig. 5C, blue arrowheads). According to this analysis, none of the newly induced alleles is as severe as the *Df(1)ED6727* control, suggesting that none correspond to a null allele. We subsequently performed immunostaining on all lines using both monoclonal and polyclonal anti-Hnt antibodies. All alleles were found to be anti-Hnt positive using the polyclonal antibody (Figure 6, Table 1). We subsequently found that the strong hypomorphic EMS induced allele *hnt<sup>XE81</sup>*, previously described as antibody-null (using the same monoclonal antibody 27B8 1G9), also stains positive for Hnt using the polyclonal antibody (Fig. 6E). Interestingly, two alleles (*hnt<sup>BHR49</sup>* and *hnt<sup>WN52</sup>*) were monoclonal negative but polyclonal positive, and although the polyclonal signal was expressed with correct tissue specificity, it did not show the normal nuclear localization of Hnt (Fig. 6D). Overall, these results further support the notion that none of these new *hnt* alleles corresponds to a null allele and that most EMS induced alleles of *hnt* produce non-functional protein.

## Discussion

In general, the approach of dCas9.VPR mediated expression of mutant alleles can be considered as a new method for characterizing alleles. In a way, this is similar to Muller's classical test for hypomorphic alleles through the synthesis of duplications containing a third copy of the mutant allele being tested. In this case, a third copy of a hypomorphic allele is expected to ameliorate the mutant phenotype compared to the phenotype of the homozygous euploid mutant (16). In the case of dCas9.VPR mediated activation of gene expression, if an overexpression phenotype is suppressed in mutant heterozygote ( $m/+$ ) relative to the wild type homozygote ( $+/+$ ), then two possibilities arise: 1) the mutant allele may not encode a functional protein; or 2) the mutant allele may be refractory to overexpression through mutation or deletion of its sgRNA target sequences. Although these two possibilities may not be mutually exclusive, sequencing the sgRNA target sequences of a mutant allele could rule out the second possibility and thereby suggest that a particular allele is associated with a disruption of the protein coding region of the GOI. The characterization of mutant alleles can be further improved if a refractory allele of the GOI is available ( $+^{REF}$ ) and the mutant is known to have intact sgRNA target sequences. In this situation, any phenotype resulting from CRISPR/Cas9 mediated activation of gene expression in the heterozygote ( $+^{REF}/m$ ), would suggest that the mutant allele is able to express a protein that is fully or partially functional. In this case, the mutant is more likely to be hypomorphic in nature, and could be associated with reduced gene expression or reduced protein function. Consistent with this, we found that the allele  $hnt^{308}$  was fully responsive to dCas9.VPR mediated activation of gene expression. This allele, which is associated with a *P* element insertion 226 base pairs



upstream of the TSS of *hnt*, was previously characterized as hypomorphic and displays a lower level of *hnt* expression (17). The dCas9.VPR activation of *hnt*<sup>308</sup> expression is consistent with the hypomorphic nature of this allele, but also indicates that the sgRNA target sequences on the *hnt*<sup>308</sup> chromosome are intact and that the protein coding region can produce Hnt product that is sufficient to generate the overexpression phenotype. The same interpretations also apply to the allele *hnt*<sup>PL67</sup>, which is an enhancer trap line associated with embryonic lethality but is largely uncharacterized.

Considering the 8 new *hnt* alleles recovered, all showed a strong refractory phenotype in the cross to the RGV stock. However, we also isolated many F1 progeny that showed intermediate phenotypes. We were very interested in the possibility of recovering weak loss-of-function *hnt* alleles from these “hits”, but none of these lines bred true as X-linked mutations. We were also aware of the possibility of recovering dose-dependent second site modifiers. Two such lines were indeed recovered that consistently resulted in an intermediate dCas9.VPR mediated *hnt* overexpression phenotype, but do not map to the X chromosome. Further analysis of these lines may allow us to identify genes that are required for the full penetrance of the *hnt* overexpression phenotype. Such genes may ultimately shed light on the pathways and target genes regulated by Hnt.

### **Can these techniques be generalized?**

Overall, we have developed a new approach for characterizing existing alleles of a GOI, and we have invented a new way to recover randomly induced mutations in a GOI based on CRISPR/Cas9 mediated activation of gene expression. The generalization of these techniques, however, depends on the recovery of refractory alleles of the GOI – that

is, alleles whose only phenotype is that of not being responsive to CRISPR/Cas9 mediated activation of gene expression. Two questions remain to be answered before this technique can be generalized. First, is it always possible to create a refractory allele for a GOI, or is this only possible for certain genes? And second, if the overexpression phenotype for a GOI is not sensitive to temperature or gene dosage, would it still be possible to recover a refractory allele? The first question cannot be answered until CRISPR/Cas9 mediated activation of gene expression is used on more genes. In regards to the second question, it is clear that the development of our system was greatly enhanced by the striking temperature and gene dosage sensitivity of the *hnt* overexpression phenotype in the pupal eye. But what if just one copy of the GOI is sufficient to generate a lethal phenotype with the three overexpression components (*sgRNA + GAL4 + UAS-dCas9.VPR*)? If the structure of a gene is such that it can be mutated to create a refractory chromosome, it should be still be possible to select viable refractory alleles. One way this could be accomplished would be to recover refractory alleles heterozygous to a deletion of the GOI in the background of *GAL4 > UAS-dCas9.VPR*. Further studies will be required to determine if such techniques are feasible.

## Materials and Methods

### Drosophila stocks

All *Drosophila* cultures were raised on standard medium at 25°C under a 12 hour light/dark cycle regime, unless otherwise indicated. Most stocks used in this study were either obtained from the Bloomington *Drosophila* Resource Center (BDRC), or derived from stocks obtained from the BDRC. The eye specific *GAL4* driver was *GMR-GAL4* =

$P\{GAL4-ninaE.GMR\}12$  (BDRC #1104). The stock ubiquitously expressing sgRNA targeted to *hnt* upstream region was  $TOE-GS00052 = y\ sc^* v\ sev^{21}; P\{y[+t7.7] v[+t1.8]=TOE.GS00052\}attP40$  (BDRC #67530). The dCas9 transcriptional activator used was  $UAS-dCas9.VPR = y\ w^*; Kr^{fl}/CyO; P\{y[+t7.7] w[+mC]=UAS-3xFLAG.dCas9.VPR\}attP2$  (BDSC #66562). RNAi knockdown of *hnt* was achieved using  $UAS-hnt-RNAi = y\ sc^* v\ sev^{21}; P\{y[+t7.7] v[+t1.8]=TRiP.HMS00894\}attP2/ TM3, Sb$  (BDRC #33943). The expression of active Cas9 in the germline used  $GAL4-nos.NGT; UAS-Cas9.P2 = w^*; P\{w[+mC]=GAL4-nos.NGT\}40; P\{y[+t7.7]=UAS-Cas9.P2\}attP2$  (BDRC #67083). The temperature sensitive *hnt* hypomorphic allele used was  $hnt^{peb} = peb\ v$  (BDRC #80). The deletion of the *hnt* gene used was

$Df(1)ED6727 = Df(1)ED6727, w^{1118}$

$P\{w[+mW.Scer\FRT.hs3]=3'.RS5+3.3'\}ED6727/FM7h$  (BDRC #8956)

The chromosome used in the mutagenesis screen was  $w\ PBac\{RB\}e02388b$  (Exelixis at Harvard medical School #e02388). Pre-existing *hnt* alleles used included  $hnt^{XE81}$ ,  $hnt^{1142}$ ,  $hnt^{308}$ , and  $hnt^{345x}$  as previously described (15, 17-19). Confocal imaging of pupal eye made use of *Ubi-DE-cadherin-GFP* as previously described (20). Complementation crosses were facilitated by the transgenic line  $peb^{BAC-CH321-46J02}$  as described (19).  $GAL4 > UAS$  based overexpression of *hnt* used  $UAS-GFP-hnt$  as previously described (21). This line  $UAS-GFP-Hnt$ , however, resulted in pupal lethality in combination with  $GMR-GAL4$ . To achieve lower levels of *hnt* overexpression not resulting in pupal lethality, the  $UAS-GFP-hnt$  insertion was mobilized by crossing to the transposase line  $\Delta 2-3$  (BDRC

#3629). The insertion line *UAS-GFP-hnt<sup>J27</sup>* was recovered and found to be viable in combination with the same *GMR-GAL4* driver.

### **EMS Mutagenesis**

3-5 day old males of the *w PBac{RB}e02388b* stock were collected and starved for 2 hours by placing in empty vials. Following starvation, male flies were transferred to bottles containing Kimwipe tissues soaked in a 2% sucrose solution containing 25 mM EMS (Sigma-Aldrich) and allowed to feed overnight. They were subsequently placed in vials with 3-5 day old virgin *RGV* females in crowded conditions and allowed to mate for 6-8 hours (30-40 virgin females with same number of males). Mated females and males were transferred to bottles for two days at which point they were removed.

### **Molecular Characterization of Refractory Mutants**

In order to characterize refractory alleles we extracted genomic DNA from a pooled group of 20-30 isogenic male flies using gSYNC DNA Extraction Kits (Geneaid) according to supplier's instructions. We used 2.5  $\mu$ L of isolated genomic DNA in 25  $\mu$ L PCR reactions (2X FroggaMix; FroggaBio) utilizing primers flanking the guide target regions at ~400 bp upstream and downstream of the sgRNA target sequences. PCR products were purified using GenepHlow Gel/PCR Kits (Geneaid) then sent out for Sanger sequencing using both forward and reverse primers.

### **Complementation crosses**

New *hnt* alleles, maintained as balanced lines over *FM7h*, were tested for complementation by crossing to *hnt<sup>peb</sup>* males at the restrictive temperature 29°C as well as males of the following genotype: *y w hnt<sup>XE81</sup>/Y; peb<sup>BAC-CH321-46J02</sup>/TM6C, Sb*. Failure to complement *hnt<sup>peb</sup>* was indicated by a rough eye phenotype, while failure to complement

*hnt*<sup>XES1</sup> was indicated by the absence of *B*<sup>+</sup> *Sb* female progeny carrying neither the *FM7h* balancer or the *peb*<sup>BAC</sup> insertion.

### **Immunostaining and Imaging**

Immunostaining of embryos was carried out as described (17). Primary antibodies were used at the indicated dilutions: mouse monoclonal anti-Hindsight (Hnt) 27B8 1G9 (1:25; from H. Lipshitz, University of Toronto), guinea pig polyclonal anti-Hindsight (1:1000; from H. Lipshitz, University of Toronto). Secondary antibodies used were: Alexa Flour® 488 goat anti-mouse and TRITC goat anti-guinea pig (1:500; Cedarlane Labs). In most cases *hnt* mutant embryos were recognized by their u-shaped morphology, which is associated with a failure to complete germ band retraction and premature death of the amnioserosa.

Confocal microscopy and confocal image processing were performed as previously described (22). Eye micrographs (Fig. 1A,B) were taken using a Nikon SMZ25 stereomicroscope equipped with Nikon Digital Sight Ri2 16.25MP colour camera and processed using extended-depth-of-focus feature of Nikon NIS-Elements Arv4.50 software. Other eye micrographs were acquired using a compound Olympus microscope with a 5X objective and oblique illumination. Z stacks were collected by manually adjusting the focal plane as images were collected using a mobile phone camera positioned over the ocular lens. Images collected were processed using ImageJ and an extended depth of focus plugin (23).

### **Acknowledgements**

Stocks obtained from the Bloomington Drosophila Resource Center (NIH P40OD018537) were used in this study. We are grateful to the BDRC as well as the Harvard Medical School for genetic stocks. We are grateful to H. Lipshitz (University of Toronto) for additional stocks and reagents. We thank C. Steele of Nikon Canada Inc. for assistance with microphotography. This work was supported by a grant to B.H.R. from the Natural Sciences and Engineering Research Council of Canada (NSERC RGPIN-2015-04458).

## References

1. Jinek M, Chylinski K, Fonfara I, Hauer M, Doudna JA, Charpentier E. A programmable dual-RNA-guided DNA endonuclease in adaptive bacterial immunity. *Science*. 2012;337(6096):816-21. doi: 10.1126/science.1225829. PubMed PMID: 22745249; PMCID: PMC6286148.
2. Bassett AR, Tibbit C, Ponting CP, Liu JL. Highly efficient targeted mutagenesis of *Drosophila* with the CRISPR/Cas9 system. *Cell Rep*. 2013;4(1):220-8. doi: 10.1016/j.celrep.2013.06.020. PubMed PMID: 23827738; PMCID: PMC3714591.
3. Gratz SJ, Cummings AM, Nguyen JN, Hamm DC, Donohue LK, Harrison MM, Wildonger J, O'Connor-Giles KM. Genome engineering of *Drosophila* with the CRISPR RNA-guided Cas9 nuclease. *Genetics*. 2013;194(4):1029-35. doi: 10.1534/genetics.113.152710. PubMed PMID: 23709638; PMCID: PMC3730909.
4. Ma D, Liu F. Genome Editing and Its Applications in Model Organisms. *Genomics Proteomics Bioinformatics*. 2015;13(6):336-44. doi: 10.1016/j.gpb.2015.12.001. PubMed PMID: 26762955; PMCID: PMC4747648.
5. Qi LS, Larson MH, Gilbert LA, Doudna JA, Weissman JS, Arkin AP, Lim WA. Repurposing CRISPR as an RNA-guided platform for sequence-specific control of gene expression. *Cell*. 2013;152(5):1173-83. doi: 10.1016/j.cell.2013.02.022. PubMed PMID: 23452860; PMCID: PMC3664290.
6. Pulecio J, Verma N, Mejia-Ramirez E, Huangfu D, Raya A. CRISPR/Cas9-Based Engineering of the Epigenome. *Cell Stem Cell*. 2017;21(4):431-47. doi: 10.1016/j.stem.2017.09.006. PubMed PMID: 28985525; PMCID: PMC6205890.
7. Adli M. The CRISPR tool kit for genome editing and beyond. *Nat Commun*. 2018;9(1):1911. doi: 10.1038/s41467-018-04252-2. PubMed PMID: 29765029; PMCID: PMC5953931.
8. Liu J, Li C, Yu Z, Huang P, Wu H, Wei C, Zhu N, Shen Y, Chen Y, Zhang B, Deng WM, Jiao R. Efficient and specific modifications of the *Drosophila* genome by means of an easy TALEN strategy. *J Genet Genomics*. 2012;39(5):209-15. doi: 10.1016/j.jgg.2012.04.003. PubMed PMID: 22624882.
9. Bibikova M, Golic M, Golic KG, Carroll D. Targeted chromosomal cleavage and mutagenesis in *Drosophila* using zinc-finger nucleases. *Genetics*. 2002;161(3):1169-75. PubMed PMID: 12136019; PMCID: PMC1462166.
10. Bier E, Harrison MM, O'Connor-Giles KM, Wildonger J. Advances in Engineering the Fly Genome with the CRISPR-Cas System. *Genetics*. 2018;208(1):1-18. doi: 10.1534/genetics.117.1113. PubMed PMID: 29301946; PMCID: PMC5753851.
11. Ewen-Campen B, Yang-Zhou D, Fernandes VR, Gonzalez DP, Liu LP, Tao R, Ren X, Sun J, Hu Y, Zirin J, Mohr SE, Ni JQ, Perrimon N. Optimized strategy for in vivo Cas9-activation in *Drosophila*. *Proc Natl Acad Sci U S A*. 2017;114(35):9409-14. doi: 10.1073/pnas.1707635114. PubMed PMID: 28808002; PMCID: PMC5584449.
12. Lin S, Ewen-Campen B, Ni X, Housden BE, Perrimon N. In Vivo Transcriptional Activation Using CRISPR/Cas9 in *Drosophila*. *Genetics*. 2015;201(2):433-42.

- doi: 10.1534/genetics.115.181065. PubMed PMID: 26245833; PMCID: PMC4596659.
13. Melani M, Simpson KJ, Brugge JS, Montell D. Regulation of cell adhesion and collective cell migration by hindsight and its human homolog RREB1. *Curr Biol.* 2008;18(7):532-7. doi: 10.1016/j.cub.2008.03.024. PubMed PMID: 18394891.
  14. Ming L, Wilk R, Reed BH, Lipshitz HD. Drosophila Hindsight and mammalian RREB-1 are evolutionarily conserved DNA-binding transcriptional attenuators. *Differentiation.* 2013;86(4-5):159-70. doi: 10.1016/j.diff.2013.12.001. PubMed PMID: 24418439.
  15. Yip ML, Lamka ML, Lipshitz HD. Control of germ-band retraction in Drosophila by the zinc-finger protein HINDSIGHT. *Development.* 1997;124(11):2129-41. PubMed PMID: 9187140.
  16. Muller HJ. Further studies on the nature and causes of gene mutations. *Proceedings of the 6th International Congress of Genetics.* 1932;1:213-5.
  17. Reed BH, Wilk R, Lipshitz HD. Downregulation of Jun kinase signaling in the amnioserosa is essential for dorsal closure of the Drosophila embryo. *Curr Biol.* 2001;11(14):1098-108. PubMed PMID: 11509232.
  18. Wilk R, Reed BH, Tepass U, Lipshitz HD. The hindsight gene is required for epithelial maintenance and differentiation of the tracheal system in Drosophila. *Dev Biol.* 2000;219(2):183-96. doi: 10.1006/dbio.2000.9619. PubMed PMID: 10694415.
  19. Farley JE, Burdett TC, Barria R, Neukomm LJ, Kenna KP, Landers JE, Freeman MR. Transcription factor Pebbled/RREB1 regulates injury-induced axon degeneration. *Proc Natl Acad Sci U S A.* 2018. doi: 10.1073/pnas.1715837115. PubMed PMID: 29295933.
  20. Reed BH, Wilk R, Schock F, Lipshitz HD. Integrin-dependent apposition of Drosophila extraembryonic membranes promotes morphogenesis and prevents anoikis. *Curr Biol.* 2004;14(5):372-80. doi: 10.1016/j.cub.2004.02.029. PubMed PMID: 15028211.
  21. Baechler BL, McKnight C, Pruchnicki PC, Biro NA, Reed BH. Hindsight/RREB-1 functions in both the specification and differentiation of stem cells in the adult midgut of Drosophila. *Biology Open.* 2015. doi: 10.1242/bio.015636.
  22. Cormier O, Mohseni N, Voytyuk I, Reed BH. Autophagy can promote but is not required for epithelial cell extrusion in the amnioserosa of the Drosophila embryo. *Autophagy.* 2012;8(2):252-64. doi: 10.4161/auto.8.2.18618. PubMed PMID: 22240588; PMCID: 3336078.
  23. Schneider CA, Rasband WS, Eliceiri KW. NIH Image to ImageJ: 25 years of image analysis. *Nat Methods.* 2012;9(7):671-5. PubMed PMID: 22930834; PMCID: PMC5554542.



## Figure 1.

### Overexpression of *hnt* disrupts eye development and the CRISPR/Cas9 mediated *hnt* overexpression phenotype is sensitive to temperature and gene dosage.

(A) Schematic showing the sgRNA target sequences of *TOE-GS00052* relative to the TSS of *hnt*. (B) Wild type eye. (C) The *hnt* overexpression phenotype of *GMR-GAL4 > UAS-GFP-Hnt<sup>Δ27</sup>*. (D) Nomenclature and associated Punnett square diagram of a balanced *hnt* allele (females) crossed to the CRISPR/Cas9 *hnt* overexpression stock (males). (E) Overexpression phenotype of *TOE-GS00052 + GMR-GAL4 > UAS-Cas9.VPR*. (F) Suppression of the overexpression phenotype of *TOE-GS00052 + GMR-GAL4 > UAS-Cas9.VPR* by co-expression of *UAS-hnt-RNAi*.

## Figure 2.

### Creating chromosomes refractory to CRISPR/Cas9 mediated overexpression of *hnt*.

Flow chart showing (1) the crossing scheme used to generate isogenic *hnt<sup>REF</sup>* lines and the sgRNA target site sequences for two such lines; and (2) crossing scheme for the recovery of the *RGV* stock (*hnt<sup>REF</sup>/hnt<sup>REF</sup>; GMR-GAL4 TOE-GS00052; UAS-dCas9.VPR*).

## Figure 3.

### Crossing scheme and screen for the selection of EMS induced recessive lethal mutations of *hnt* as an F1 visible screen.

Virgin females of the *RGV* stock crossed to EMS treated males results in the vast majority of females showing the *hnt* overexpression phenotype. Rare females not showing the *hnt* overexpression phenotype are selected as balanced stocks (w

*PBac{RB}e02388b hnt\* / FM7h,w*) and tested to determine if they are new *hnt* loss-of-function alleles or newly induced refractory chromosomes.

#### Figure 4.

##### **EMS-induced *hnt*<sup>REF</sup> alleles are associated with mutations in the *sgRNA* target sequences of *TOE-GS00052*.**

Sequencing results for seven newly recovered EMS induced *hnt*<sup>REF</sup> alleles shown in alignment with the reference genomic sequence (topmost). The *TOE-GS00052* sgRNA target sequences are highlighted in yellow. The PAM motifs for the two sgRNA targets sequences of *TOE-GS00052* are underlined. Single base pair changes of *hnt*<sup>REF-BHR7</sup> and *hnt*<sup>REF-WN72</sup> are shown in red font. The bottom five *hnt*<sup>REF</sup> allele sequences are identical, indicative of a premeiotic mutation and represent a single mutagenic event.

#### Figure 5.

##### **New *hnt* alleles can be arranged into an allelic series of strong hypomorphs according to their pupal eye phenotype when heterozygous to *hnt*<sup>peb</sup>.**

(A) *Ubi-DEcadherin-GFP* expression in control *hnt*<sup>peb/+</sup> pupal eye showing the normal ommatidial structure with four cone cells per ommatidium. (B) Homozygous *hnt*<sup>peb/hnt</sup><sup>peb</sup> reared at 25°C showing abnormal ommatidia having fewer than four cone cells (white arrowheads). (C) *hnt*<sup>peb/Df(1)ED6727</sup> raised at 25°C showing abnormal ommatidia with more (blue arrowheads) or less than four cone cells (white arrowheads). (D) *hnt*<sup>peb/hnt</sup><sup>WN47</sup> reared at 25°C showing abnormal ommatidia having fewer than four cone cells (white arrowheads). (E) Stacked bar graph showing the distribution of ommatidia cone cell

numbers in wild type, and new *hnt* alleles heterozygous to *hnt<sup>peb</sup>* reared at 25°C. Scale bar represents 20 mm.

## Figure 6.

### Examples of immunostaining of *hnt* mutants using anti-Hnt monoclonal and polyclonal antibodies.

Shown are representative anti-Hnt monoclonal (A-D) and anti-Hnt polyclonal (A'-D', E) confocal micrographs. (A, A') Wild type (wt) showing normal pattern of anti-Hnt immunostaining in a stage 15 embryo. (B, B') *hnt<sup>WN29</sup>* shown in same frame as wt sib showing reduced anti-Hnt signal using both monoclonal and polyclonal antibody. The strong oenocyte signal observed in wild type is not seen in the *hnt<sup>WN29</sup>* mutant (arrowheads). (C, C') *hnt<sup>BHR49</sup>* u-shaped mutant embryo showing weak monoclonal (arrowhead) but strong polyclonal signal. (D, D') *hnt<sup>WN52</sup>* u-shaped mutant embryo showing absence of signal with the monoclonal antibody and weak non-nuclear signal with the polyclonal antibody. (E) *hnt<sup>XE81</sup>* u-shaped mutant with partially degenerated amnioserosa (arrowhead) showing strong anti-Hnt signal using the polyclonal antibody.

## Table 1.

### Summary of immunostaining results using anti-Hnt monoclonal and polyclonal antibodies as well as terminal phenotype analysis of new *hnt* alleles.

\* Anti-Hnt signal was not localized to the nuclei.

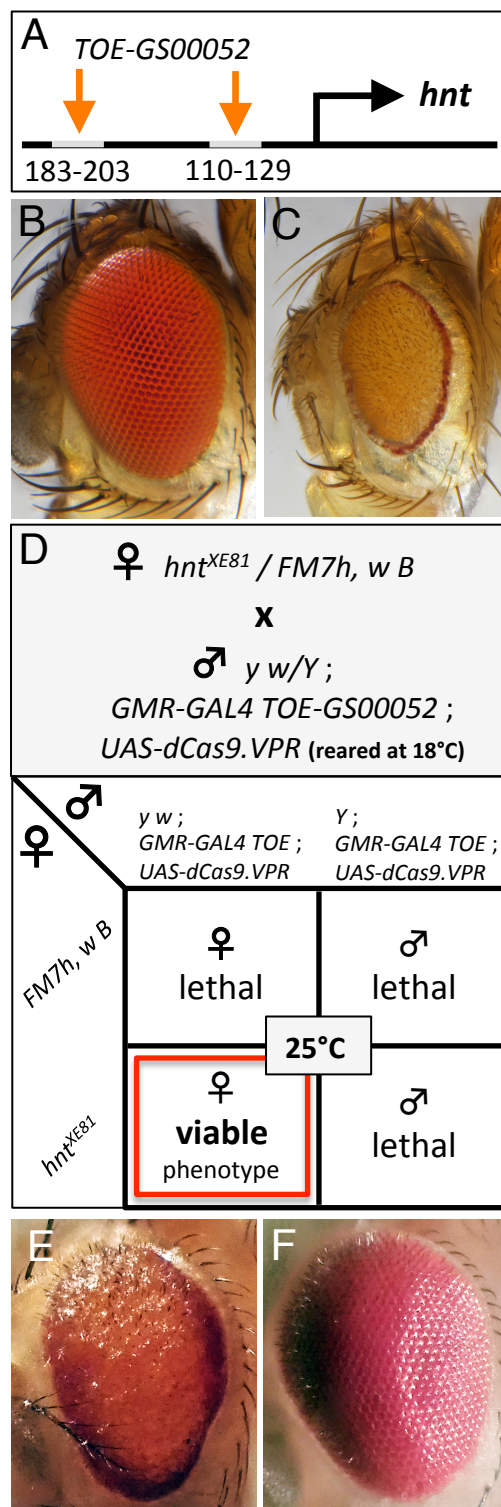

Figure 1



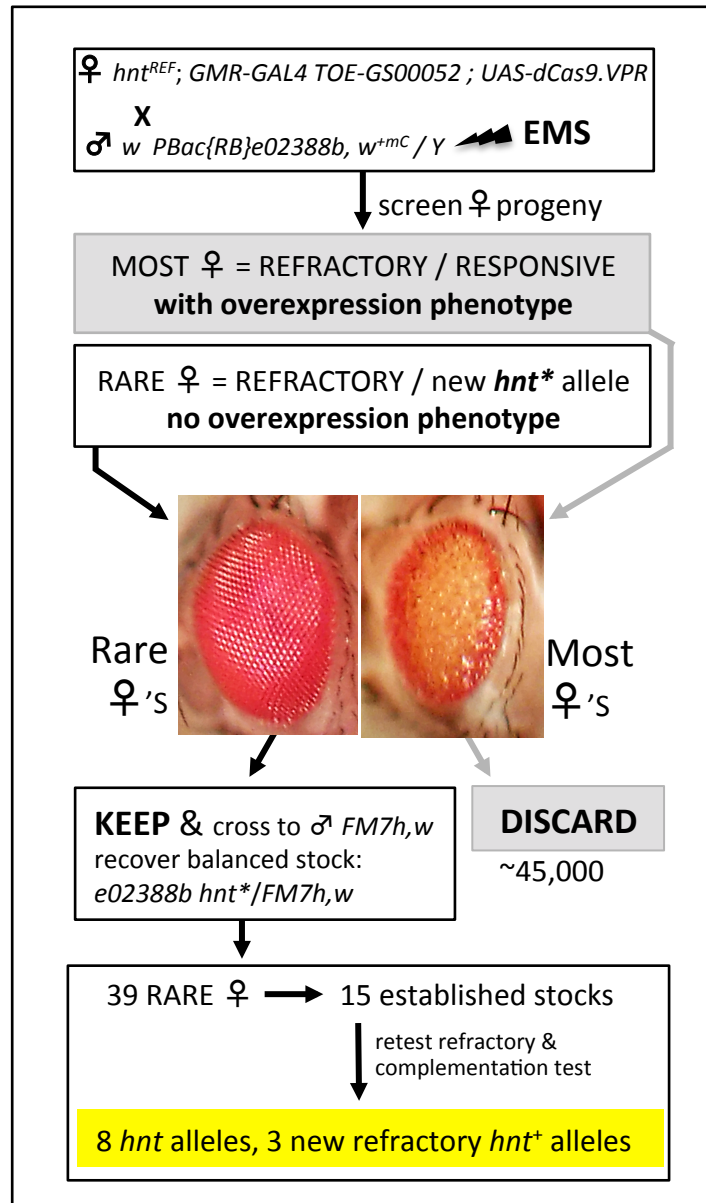

Figure 3

```
hntwildtype GACAAAATTTGAAACGAAGAATGAGAAGGAAAGAAAATCCAAGCTGCGCTGCC
hntREF-BHR7 GACAAAATTTGAAACGAAGAATGAGAAGGAAAGAAAATCCAAGCTGCGCTGCC
hntREF-WN72 GACAAAATTTGAAACGAAGAATGAGAAGGAAAGAAAATCCAAGCTGCGCTGCC
hntREF-BHR17 GACAAAATTTGAAACGAAGAATG-----
hntREF-WN30 GACAAAATTTGAAACGAAGAATG-----
hntREF-WN31 GACAAAATTTGAAACGAAGAATG-----
hntREF-WN35 GACAAAATTTGAAACGAAGAATG-----
hntREF-WN36 GACAAAATTTGAAACGAAGAATG-----

hntwildtype TCCGTTGAAAAAAAAAATGAGAAAAACCAGACTGCTTCTCTTTCTCTCTTTTTC
hntREF-BHR7 TCCGTTGAAAAAAAAAATGAGAAAAACCAGACTGCTTCTCTTTCTCTCTTTTTC
hntREF-WN72 TCCGTTGAAAAAAAAAATGAGAAAAACTAGACTGCTTCTCTTTCTCTCTTTTTC
hntREF-BHR17 -----GCTTCTCTTTCTCTCTTTTTC
hntREF-WN30 -----GCTTCTCTTTCTCTCTTTTTC
hntREF-WN31 -----GCTTCTCTTTCTCTCTTTTTC
hntREF-WN35 -----GCTTCTCTTTCTCTCTTTTTC
hntREF-WN36 -----GCTTCTCTTTCTCTCTTTTTC
```

Figure 4

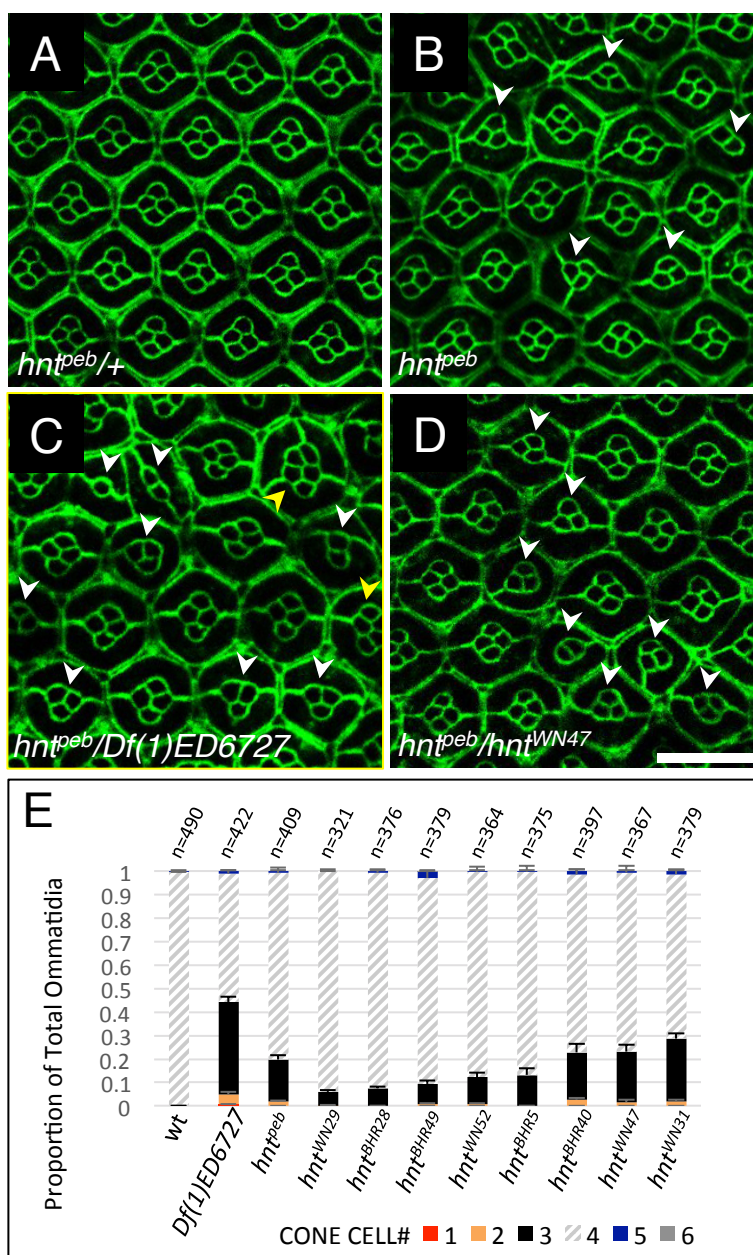

Figure 5



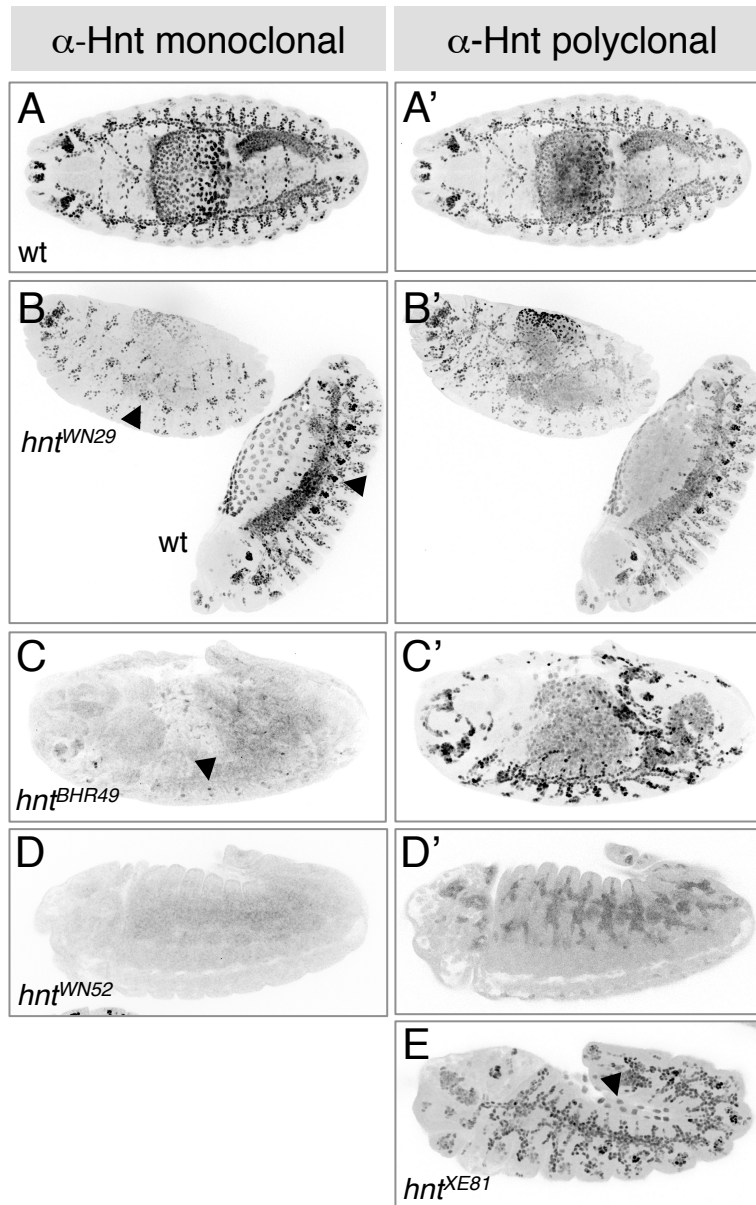

Figure 6

| <b>Allele</b>              | <b><math>\alpha</math>-Hnt<br/>monoclonal</b> | <b><math>\alpha</math>-Hnt<br/>polyclonal</b> | <b>GBR<br/>phenotype</b> |
|----------------------------|-----------------------------------------------|-----------------------------------------------|--------------------------|
| <i>hnt<sup>WN29</sup></i>  | ++                                            | ++                                            | retracted                |
| <i>hnt<sup>BHR28</sup></i> | +                                             | +++                                           | tail-up                  |
| <i>hnt<sup>BHR49</sup></i> | +                                             | +++                                           | unretracted              |
| <i>hnt<sup>WN52</sup></i>  | -                                             | +*                                            | unretracted              |
| <i>hnt<sup>BHR5</sup></i>  | +                                             | +                                             | unretracted              |
| <i>hnt<sup>BHR40</sup></i> | +                                             | +++                                           | unretracted              |
| <i>hnt<sup>WN47</sup></i>  | ++                                            | +++                                           | unretracted              |
| <i>hnt<sup>WN31</sup></i>  | -                                             | +*                                            | unretracted              |
| <i>Df(1)ED6727</i>         | -                                             | -                                             | unretracted              |
